# Supplementary material for: NH3 Sensor Based on 3D Hierarchical Flower-Shaped n-ZnO/p-NiO Heterostructures Yields Outstanding Sensing Capabilities at ppb Level
Source: PubMed Central journal article supplement (PMC7506851; doi:10.3390/s20174754), 2020-08-22
Supplement: sensors-20-04754-s001.pdf [file sensors-20-04754-s001.pdf]

# Supporting information

**NH<sub>3</sub> sensor based on 3D hierarchical flower-shaped n-ZnO/p-NiO heterostructures yields outstanding sensing capabilities at ppb level**

Zhenting Zhao<sup>a, b</sup>, Haoyue Yang<sup>b</sup>, Zihan Wei<sup>c</sup>, Yan Xue<sup>b</sup>, Yongjiao Sun<sup>b</sup>, Wenlei Zhang<sup>b</sup>, Pengwei Li<sup>b</sup>, Weiping Gong<sup>a</sup>, Serge Zhuiykov<sup>c</sup> and Jie Hu<sup>b\*</sup>

<sup>a</sup> Guangdong Provincial Key Laboratory of Electronic Functional Materials and Devices, Huizhou University, Huizhou 516001, Guangdong, China

<sup>b</sup> Center of Nano Energy and Devices, College of Information and computer, Taiyuan University of Technology, Taiyuan 030024, Shanxi, China

<sup>c</sup> Ghent University Global Campus, Department of Solid State Science, Faculty of Science, 119 Songdomunhwa-ro, Yeonsu-gu, Incheon 21985, South Korea

\*Correspondence: [hujie@tyut.edu.cn](mailto:hujie@tyut.edu.cn)

S1: Gas response of the  $Zn_1Ni_5$  under different working temperatures

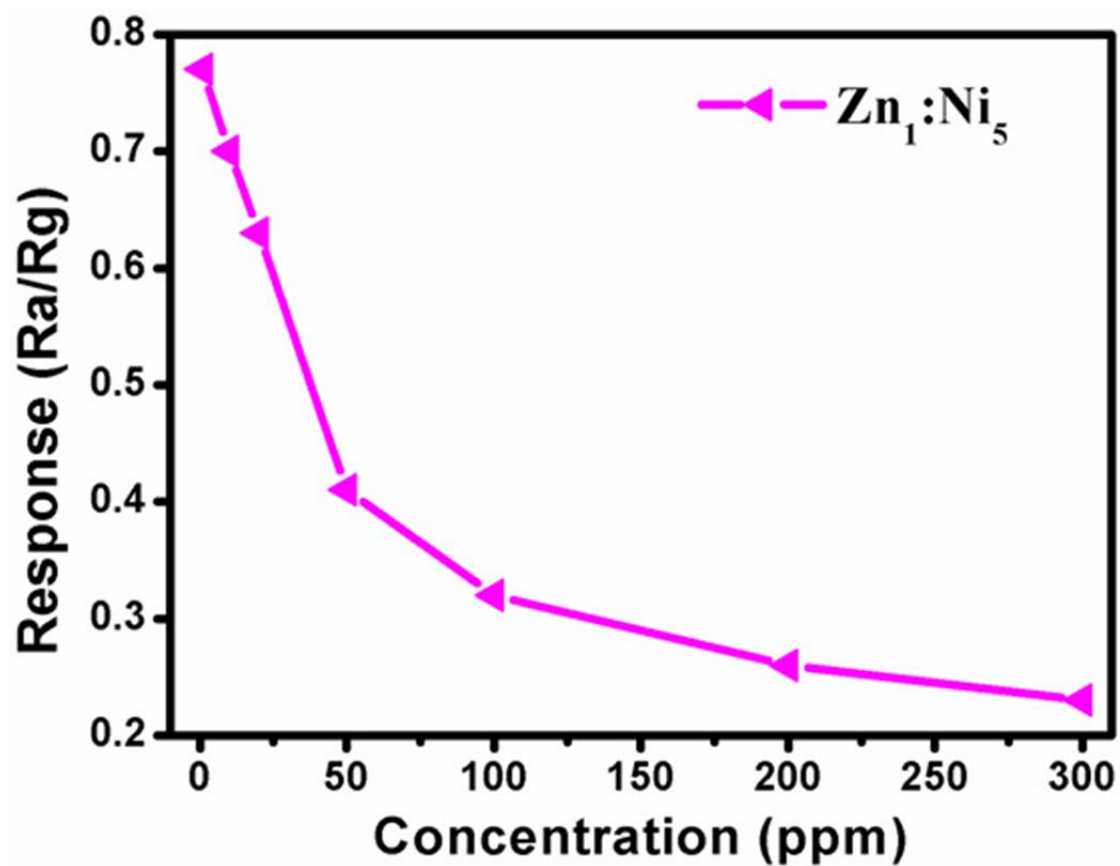

Figure. S1 Gas response of the  $Zn_1Ni_5$  toward 200 ppm  $NH_3$  under the different working temperatures.

S2: Dynamic response of the  $Zn_1Ni_5$  in presence of 1-300 ppm concentrations of  $NH_3$

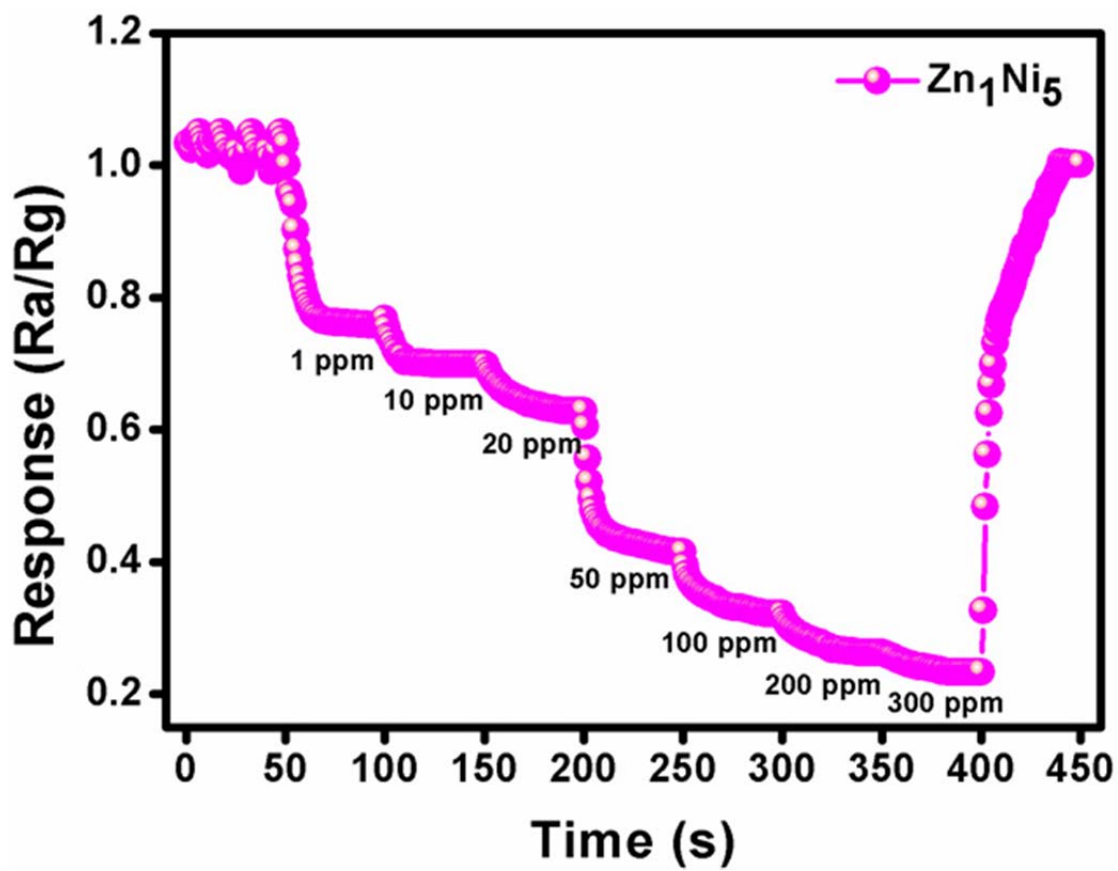

Figure. S2 Dynamic response of the  $Zn_1Ni_5$  to 1-300 ppm concentrations of  $NH_3$  at 280 °C.

S3: Relationship of NH<sub>3</sub> concentration vs. response

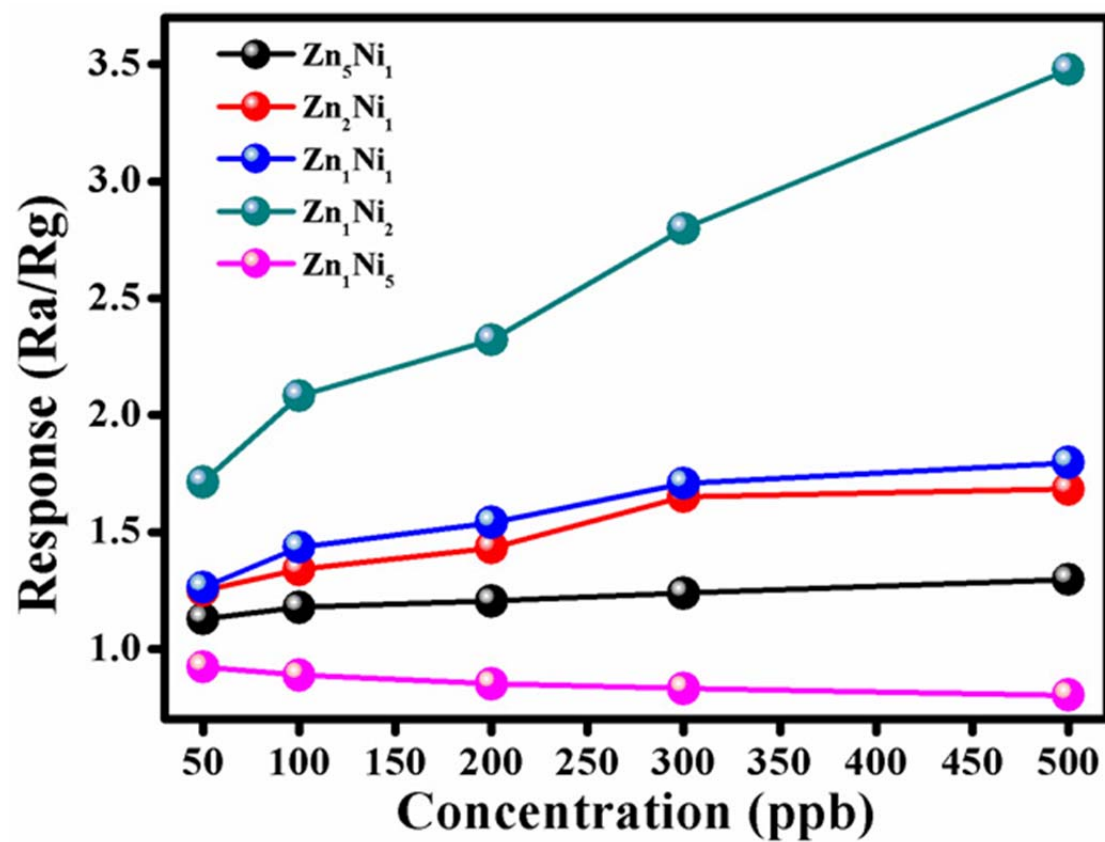

Figure. S3 Response of the 3D *n*-ZnO/*p*-NiO with the different Zn-to-Ni molar ratio to 50-500 ppb NH<sub>3</sub> concentrations at 280 °C.

S4: Energy band structure of p-type NiO and n-type ZnO before and after contact

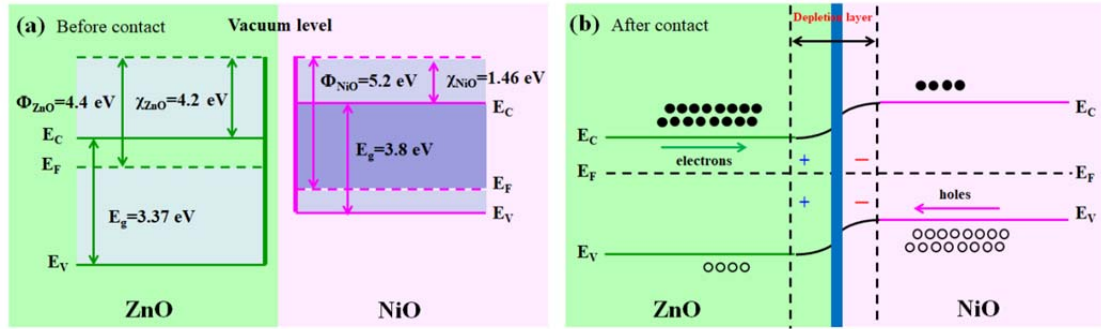

**Figure. S4** Schematic diagram of the energy band structure of p-type NiO and n-type ZnO before (a) and after (b) contact.
